# Supplementary material for: Roles of Spatial Parameters on the Oscillation of Nuclear NF-κB: Computer Simulations of a 3D Spherical Cell
Source: PubMed Central journal article supplement (PMC3463570; doi:10.1371/journal.pone.0046911), 2012-10-03
Supplement: pone.0046911.s006.pdf [file pone.0046911.s006.pdf]

**Table S1 Parameters for the temporal model.**

| parameters | values                 | unit | parameters    | values                 | unit |
|------------|------------------------|------|---------------|------------------------|------|
| a1         | $2.25 \times 10^{+04}$ | /M/s | tp2_2         | $1.00 \times 10^{-04}$ | /s   |
| a2         | $6.00 \times 10^{+03}$ | /M/s | tr1           | $4.00 \times 10^{-03}$ | /s   |
| a3         | $9.00 \times 10^{+03}$ | /M/s | tr2           | $1.70 \times 10^{+05}$ | /M/s |
| a4         | $5.00 \times 10^{+05}$ | /M/s | a • tr2a      | $1.50 \times 10^{-12}$ | M/s  |
| a5         | $5.00 \times 10^{+05}$ | /M/s | b • tr2b      | $2.30 \times 10^{-13}$ | M/s  |
| a6         | $5.00 \times 10^{+05}$ | /M/s | e • tr2e      | $1.70 \times 10^{-13}$ | M/s  |
| a7         | $1.85 \times 10^{+05}$ | /M/s | tr3           | $2.80 \times 10^{-04}$ | /s   |
| a8         | $4.80 \times 10^{+04}$ | /M/s | IKK           | $2.00 \times 10^{-09}$ | M    |
| a9         | $7.00 \times 10^{+04}$ | /M/s | IKK.IkBa      | 0                      | M    |
| d1         | $1.25 \times 10^{-03}$ | /s   | IKK.IkBa.NFkB | 0                      | M    |
| d2         | $1.75 \times 10^{-03}$ | /s   | IKK.IkBb      | 0                      | M    |
| d3         | $1.75 \times 10^{-03}$ | /s   | IKK.IkBb.NFkB | 0                      | M    |
| d4         | $5.00 \times 10^{-04}$ | /s   | IKK.IkBe      | 0                      | M    |
| d5         | $5.00 \times 10^{-04}$ | /s   | IKK.IkBe.NFkB | 0                      | M    |
| d6         | $5.00 \times 10^{-04}$ | /s   | IkBa          | $5.85 \times 10^{-07}$ | M    |
| deg1       | $1.00 \times 10^{-04}$ | /s   | IkBa.NFkB     | $2.95 \times 10^{-07}$ | M    |
| deg2       | $2.10 \times 10^{-05}$ | /s   | IkBb          | $1.97 \times 10^{-09}$ | M    |
| k01        | $8.00 \times 10^{-05}$ | /s   | IkBb.NFkB     | $8.80 \times 10^{-10}$ | M    |
| k02        | $8.30 \times 10^{-05}$ | /s   | IkBe          | $1.45 \times 10^{-09}$ | M    |
| k1         | $9.00 \times 10^{-02}$ | /s   | IkBe.NFkB     | $6.51 \times 10^{-10}$ | M    |
| k2         | $1.40 \times 10^{-02}$ | /s   | NFkB          | $4.07 \times 10^{-10}$ | M    |
| k2_2       | $5.60 \times 10^{-03}$ | /s   | n_IkBa        | $3.64 \times 10^{-09}$ | M    |
| r1         | $3.70 \times 10^{-02}$ | /s   | n_IkBa.NFkB   | $2.49 \times 10^{-09}$ | M    |
| r2         | $1.50 \times 10^{-02}$ | /s   | n_IkBb        | $6.42 \times 10^{-12}$ | M    |
| r3         | $2.20 \times 10^{-02}$ | /s   | n_IkBb.NFkB   | $1.05 \times 10^{-11}$ | M    |
| r4         | $1.85 \times 10^{-01}$ | /s   | n_IkBe        | $4.75 \times 10^{-12}$ | M    |
| r5         | $7.50 \times 10^{-02}$ | /s   | n_IkBe.NFkB   | $7.76 \times 10^{-12}$ | M    |
| r6         | $1.10 \times 10^{-01}$ | /s   | n_NFkB        | $2.00 \times 10^{-08}$ | M    |
| tp1        | $6.00 \times 10^{-05}$ | /s   | t_IkBa        | $8.00 \times 10^{-11}$ | M    |
| tp1_2      | $1.50 \times 10^{-04}$ | /s   | t_IkBb        | $5.37 \times 10^{-11}$ | M    |
| tp2        | $4.00 \times 10^{-05}$ | /s   | t_IkBe        | $3.97 \times 10^{-11}$ | M    |
